# Supplementary material for: Low temperature water based electrolytes for MnO2/carbon supercapacitors
Source: Royal Society of Chemistry journal article supplement (doi:10.1039/c3cp50359c), 2013-01-01
Supplement: c3cp50359c.pdf [file c3cp50359c.pdf]

## Electronic supplementary information (ESI)

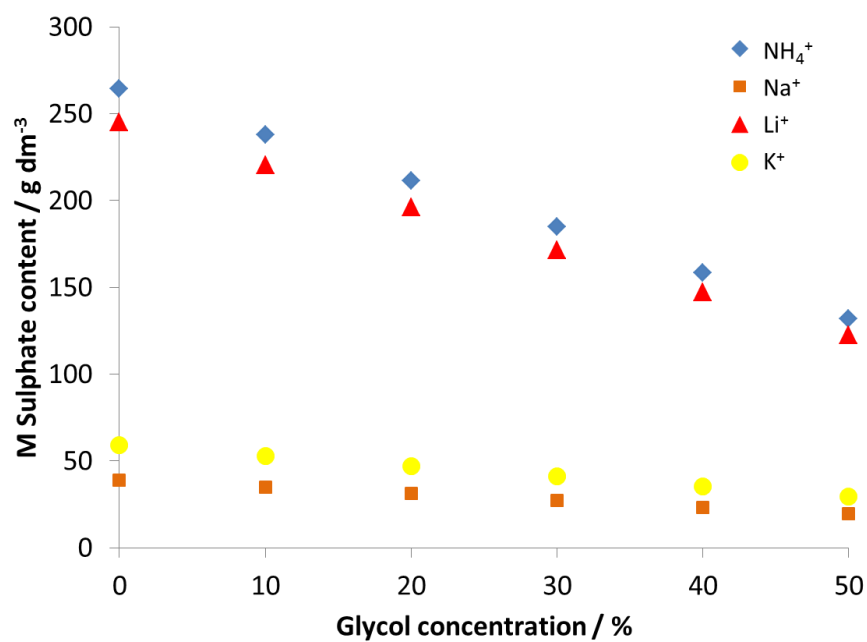

Fig. ESI01. Variation in electrolyte concentration with ethylene glycol addition.

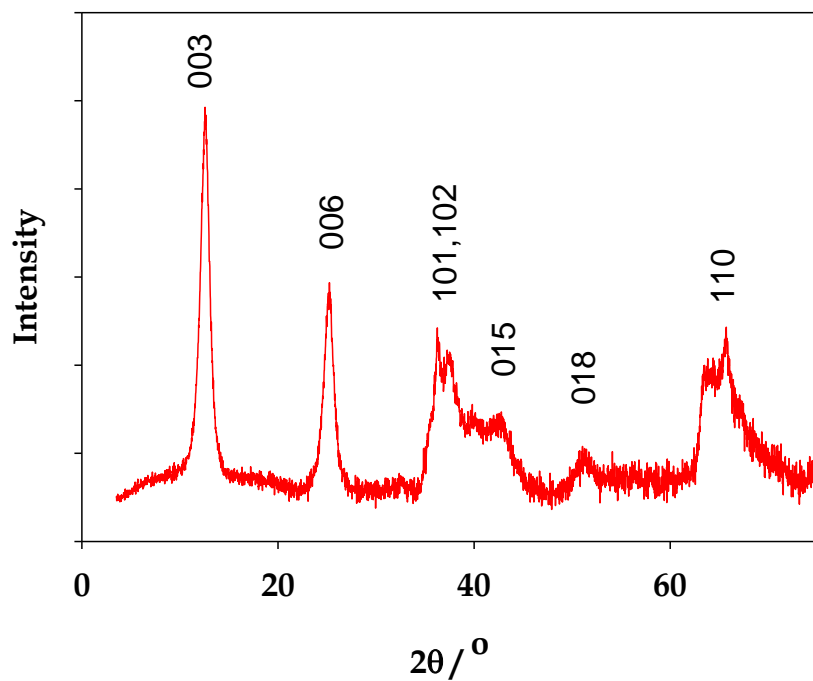

Fig. ESI02. Powder XRD profile of MnO<sub>2</sub> birnessite.

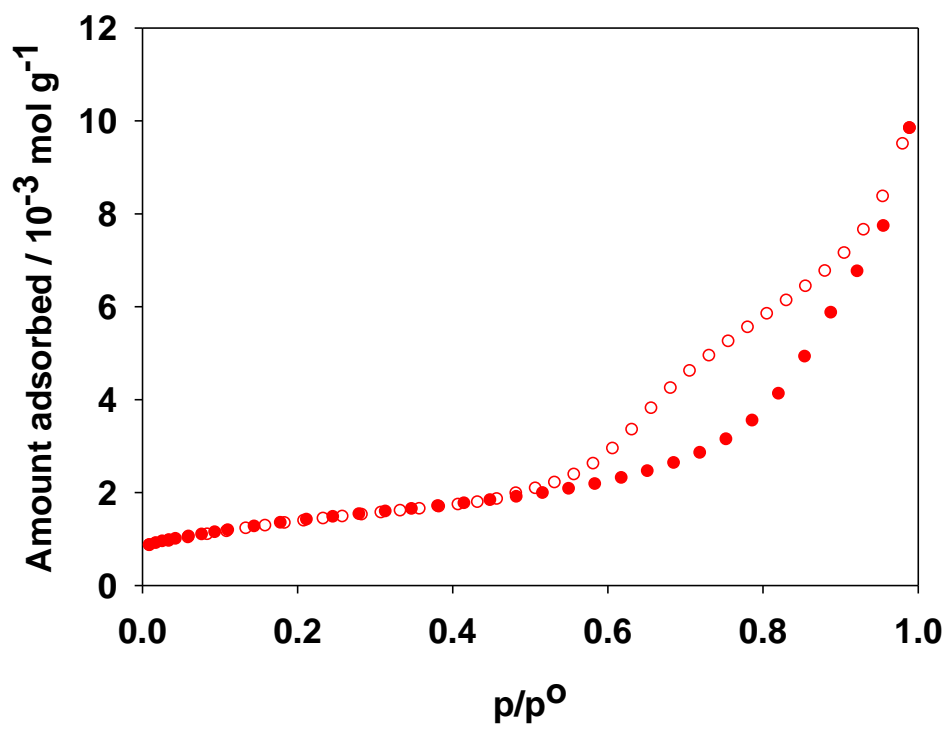

Fig. ESI03. N<sub>2</sub> sorption isotherm at 77K of MnO<sub>2</sub> birnessite.
